# Supplementary material for: Modular generation of fluorescent phycobiliproteins
Source: Royal Society of Chemistry journal article supplement (doi:10.1039/c3pp25383j), 2013-03-08
Supplement: c3pp25383j.pdf [file c3pp25383j.pdf]

## Modular Generation of Fluorescent Phycobiliproteins

Xian-Jun Wu <sup>a,b</sup>, Kun Chang <sup>b</sup>, Juan Luo <sup>b</sup>, Ming Zhou <sup>b</sup>, Hugo Scheer <sup>c</sup>, Kai-Hong Zhao <sup>\*b</sup>

<sup>a</sup> College of Environmental Science and Engineering, Huazhong University of Science and Technology, Wuhan 430074, P.R. China

<sup>b</sup> State Key Laboratory of Agricultural Microbiology, Huazhong Agricultural University, Wuhan 430070, P.R. China

<sup>c</sup> Department Biologie I, Universität München, Menzinger Str. 67, D-80638 München, Germany

**Corresponding author:** Kai-Hong Zhao, State Key Laboratory of Agricultural Microbiology, Huazhong Agricultural University, Wuhan 430070, P.R. China, Tel/fax: +86-27-87284301, E-mail: khzhao@163.com

### Supplementary Information

(2 tables)

**Table S1: Primers for the respective DNA segments for fusion.**

| Primer | Sequence                                   | DNA                    |
|--------|--------------------------------------------|------------------------|
| P1     | 5'-GCGGAATTCATATGCCAATTGACTCAGTTACAG-3'    | <i>rpcG::ho1::pcyA</i> |
| P2     | 5'-GTGGATCCGAGATCTAGAACCTTTTTGTTTTCGA-3'   |                        |
| P3     | 5'-CGCCATATGAATATTGAAGAATTTTTTGAA-3'       | <i>cpcS::ho1::pcyA</i> |
| P4     | 5'-TTTAAGATCTCCACTTGATGCAGAATTAGC-3'       |                        |
| P5     | 5'-CAGATATCCATGGTAATGACTAAAAACCCAAGAAAT-3' | <i>cpcS::ho1::pebS</i> |
| P6     | 5'-CCCCTCGAGTCATTTGTATGAAAAAAGGAA-3'       | <i>cpcT::ho1::pebS</i> |
| P7     | 5'-TTGCATATGACTCACTCTACAGACATAGCC-3'       | <i>cpcT::ho1::pcyA</i> |
| P8     | 5'-TTTTAGATCTTTATACTCGGCACTTATTTTGAC-3'    |                        |

**Table S2: Plasmids used.** The pACYCDuet, pCDFDuet and pET30, from Novagen, are T7 promoter expression vectors. pACYCDuet and pCDFDuet are designed to co-express two target proteins in *E. coli*. Using the three vector-derivatives together with compatible replicons and antibiotic resistance, 5 proteins could be co-expressed in the same cell, thereby generating the respective designed phycobiliproteins in *E. coli*. Subscripts indicate the strain of the parent organisms.

| Antibiotic resistance | Plasmids with P15A replicon                                                                                | Plasmids with CloDF13 replicon | Plasmids with ColE1 replicon                                                                                                                                                                                                                                                                                                                                                                                                                                                                                                                      |
|-----------------------|------------------------------------------------------------------------------------------------------------|--------------------------------|---------------------------------------------------------------------------------------------------------------------------------------------------------------------------------------------------------------------------------------------------------------------------------------------------------------------------------------------------------------------------------------------------------------------------------------------------------------------------------------------------------------------------------------------------|
|                       | pACYCDuet derivatives                                                                                      | pCDFDuet derivatives           | pET30 derivatives                                                                                                                                                                                                                                                                                                                                                                                                                                                                                                                                 |
| Kanamycin             |                                                                                                            |                                | pET-cpcB <sub>PCC7603</sub><br>pET-rpcG <sub>WH8102</sub><br>pET-cpcS <sub>PCC7120</sub> ::ho1 <sub>PCC7120</sub> ::pcyA <sub>PCC7120</sub><br>pET-cpcS <sub>PCC7120</sub> ::ho1 <sub>PCC7120</sub> ::pebS <sup>a</sup><br>pET-cpcT <sub>PCC7120</sub> ::ho1 <sub>PCC7120</sub> ::pcyA <sub>PCC7120</sub><br>pET-cpcT <sub>PCC7120</sub> ::ho1 <sub>PCC7120</sub> ::pebS <sup>a</sup><br>pET-rpcG <sub>WH8120</sub> ::ho1 <sub>PCC7120</sub> ::pcyA <sub>PCC7120</sub><br>pET-rpcG <sub>WH8120</sub> ::ho1 <sub>PCC7120</sub> ::pebS <sup>a</sup> |
| Chloramphenicol       | pACYC-ho1 <sub>PCC7120</sub> ::pcyA <sub>PCC7120</sub><br>pACYC-ho1 <sub>PCC7120</sub> ::pebS <sup>a</sup> |                                |                                                                                                                                                                                                                                                                                                                                                                                                                                                                                                                                                   |
| Streptomycin          |                                                                                                            | pCDF-cpcB <sub>PCC7603</sub>   |                                                                                                                                                                                                                                                                                                                                                                                                                                                                                                                                                   |

|  |  |                                                                                              |  |
|--|--|----------------------------------------------------------------------------------------------|--|
|  |  | pCDF-pecA <sub>PCC7603</sub><br>pCDF-cpcS <sub>PCC7120</sub><br>pCDF-cpcT <sub>PCC7120</sub> |  |
|--|--|----------------------------------------------------------------------------------------------|--|

<sup>a</sup> *pebS* was synthesized according to the related gene sequence of *Prochlorococcus* phage P-SSM2 (Tang et al. 2012).
